# Supplementary material for: Improving optoelectronic and charge transport properties of D–π–D type diketopyrrolopyrrole-pyrene derivatives as multifunctional materials for organic solar cell applications
Source: Royal Society of Chemistry journal article supplement (doi:10.1039/c9ra04304g), 2019-01-01
Supplement: c9ra04304g1.pdf [file c9ra04304g1.pdf]

## Improving optoelectronic and charge transport properties of D- $\pi$ -D type diketopyrrolopyrrole-pyrene derivatives as multifunctional materials for organic solar cells applications

Ruifa Jin <sup>a,b\*</sup>, Kexin Li <sup>a</sup>, Xueli Han <sup>a</sup>

<sup>a</sup> College of Chemistry and Chemical Engineering, Chifeng University, Chifeng 024000, China

<sup>b</sup> Inner Mongolia Key Laboratory of Photoelectric Functional Materials, Chifeng 024000, P. R. China

### Table of Contents

**Table S1** Calculated the longest absorption wavelengths  $\lambda_{\text{abs}}$  of parent molecule **1** by various methods with 6-31G(d,p) basis set, along with available experimental data.

**Table S2** The Calculated  $E_{\text{HOMO}}$  and  $E_{\text{LUMO}}$  (in eV) for PC<sub>61</sub>BM and PC<sub>71</sub>BM at PBE0/6-31G (d,p) and B3LYP/6-31G (d,p) levels, along with available experimental data.

**Table S3** The differences between the  $E_{\text{HOMO}}$  of **1-8** and the  $E_{\text{LUMO}}$  of PC<sub>61</sub>BM and PC<sub>71</sub>BM ( $\Delta E_{\text{L-H}}$ ) at the PBE0/6-31G(d,p) level.

**Table S1** Calculated the longest absorption wavelengths  $\lambda_{\text{abs}}$  of parent molecule **1** in chloroform by various methods with 6-31G(d,p) basis set, along with available experimental data.

| Methods                     | $\lambda_{\text{abs}}$ |
|-----------------------------|------------------------|
| B3LYP/6-31G(d,p)            | 615                    |
| PBE0/6-31G(d,p)             | 583                    |
| CAM-B3LYP/6-31G(d,p)        | 503                    |
| LC- $\omega$ PBE/6-31G(d,p) | 452                    |
| $\omega$ B97XD /6-31G(d,p)  | 493                    |
| M062X /6-31G(d,p)           | 507                    |
| Exp <sup>[a]</sup>          | 589                    |

<sup>[a]</sup> Experimental results of **1** were taken from Ref. [39].

**Table S2** The Calculated  $E_{\text{HOMO}}$  and  $E_{\text{LUMO}}$  (in eV) for PC<sub>61</sub>BM and PC<sub>71</sub>BM at PBE0/6-31G (d,p) and B3LYP/6-31G (d,p) levels, along with available experimental data.

| Methods            | PC <sub>61</sub> BM |                   | PC <sub>71</sub> BM |                   |
|--------------------|---------------------|-------------------|---------------------|-------------------|
|                    | $E_{\text{HOMO}}$   | $E_{\text{LUMO}}$ | $E_{\text{HOMO}}$   | $E_{\text{LUMO}}$ |
| PBE0/6-31G (d,p)   | -5.98               | -3.99             | -5.92               | -3.82             |
| B3LYP/6-31G (d,p)  | -5.67               | -3.75             | -5.61               | -3.60             |
| EXP <sup>[a]</sup> | -6.00               | -3.80             | -6.00               | -3.95             |

<sup>[a]</sup> Experimental results of PC<sub>61</sub>BM and PC<sub>71</sub>BM were taken from Refs [52] and[53], respectively.

**Table S3** The differences between the  $E_{\text{HOMO}}$  of **1–8** and the  $E_{\text{LUMO}}$  of PC<sub>61</sub>BM and PC<sub>71</sub>BM ( $\Delta E_{\text{L-H}}$ ) at the PBE0/6-31G(d,p) level.

| Molecules | $\Delta E_{\text{L-H}}^{[\text{a}]}$ | $\Delta E_{\text{L-H}}^{[\text{b}]}$ |
|-----------|--------------------------------------|--------------------------------------|
| <b>1</b>  | 1.12                                 | 1.29                                 |
| <b>2</b>  | 1.34                                 | 1.51                                 |
| <b>3</b>  | 1.07                                 | 1.24                                 |
| <b>4</b>  | 1.19                                 | 1.36                                 |
| <b>5</b>  | 1.24                                 | 1.41                                 |
| <b>6</b>  | 1.28                                 | 1.45                                 |
| <b>7</b>  | 1.20                                 | 1.37                                 |
| <b>8</b>  | 1.40                                 | 1.57                                 |

<sup>[a]</sup>  $\Delta E_{\text{L-H}}$  values for PC<sub>61</sub>BM as acceptor; <sup>[b]</sup>  $\Delta E_{\text{L-H}}$  values for PC<sub>71</sub>BM as acceptor.
